# Supplementary material for: Reconstruction of human protein interolog network using evolutionary conserved network
Source: PubMed Central journal article supplement (PMC1885812; doi:10.1186/1471-2105-8-152), 2007-05-10
Supplement: 1471-2105-8-152-S2.pdf [file 1471-2105-8-152-S2.pdf]

## Additional File 2

**Additional Table A1 — Distributions of  $D$  score between the different interaction data sets**

| $D$ Score | Interaction data sets |         |         |         |         |         |         |         |
|-----------|-----------------------|---------|---------|---------|---------|---------|---------|---------|
|           | KNOWN2                | TP4     | TP0     | BTP     | PU4     | PU0     | BPU     | RANDOMS |
| Min.      | 0.00000               | 0.00000 | 0.00000 | 0.00000 | 0.00000 | 0.00000 | 0.00000 | 0.00000 |
| Mean      | 0.00035               | 0.00080 | 0.00050 | 0.00040 | 0.00030 | 0.00011 | 0.00009 | 0.00003 |
| Max.      | 0.02165               | 0.01589 | 0.01589 | 0.01589 | 0.01783 | 0.01783 | 0.01783 | 0.01783 |
| SD.       | 0.00117               | 0.00182 | 0.00141 | 0.00108 | 0.00109 | 0.00053 | 0.00033 | 0.00019 |
| Std Err   | 0.00001               | 0.00005 | 0.00003 | 0.00002 | 0.00001 | 0.00000 | 0.00000 | 0.00000 |

**Additional Table A2 — ANOVA tests of  $D$  score between the different interaction data sets**

| Comparison         | Diff of Means | t        | Unadjusted P | Critical Level | Significant? |
|--------------------|---------------|----------|--------------|----------------|--------------|
| KNOWN2 vs. TP4     | 0.000452      | 27.06    | 4.43E-161    | 0.004          | Yes          |
| KNOWN2 vs. TP0     | 0.000148      | 11.609   | 3.78E-31     | 0.009          | Yes          |
| KNOWN2 vs. BTP     | 0.0000499     | 4.877    | 0.00000108   | 0.05           | Yes          |
| KNOWN2 vs. PU4     | 0.0000483     | 8.776    | 1.70E-18     | 0.013          | Yes          |
| KNOWN2 vs. PU0     | 0.00025       | 63.99000 | 0.00000      | 0.00200        | Yes          |
| KNOWN2 vs. BPU     | 0.00026       | 67.46400 | 0.00000      | 0.00200        | Yes          |
| KNOWN2 vs. RANDOMS | 0.00032       | 83.31700 | 0.00000      | 0.00200        | Yes          |
| TP4 vs. TP0        | 0.000304      | 14.818   | 1.17E-49     | 0.007          | Yes          |
| TP4 vs. BTP        | 0.000402      | 21.085   | 1.26E-98     | 0.005          | Yes          |
| TP4 vs. PU4        | 0.0005        | 29.446   | 2.50E-190    | 0.004          | Yes          |
| TP4 vs. PU0        | 0.000697      | 42.223   | 0            | 0.002          | Yes          |
| TP4 vs. BPU        | 0.000714      | 43.227   | 0            | 0.003          | Yes          |
| TP4 vs. RANDOMS    | 0.00077       | 46.64300 | 0.00000      | 0.00200        | Yes          |
| TP0 vs. BTP        | 0.0000979     | 6.235    | 4.51E-10     | 0.017          | Yes          |
| TP0 vs. PU4        | 0.000196      | 14.961   | 1.37E-50     | 0.006          | Yes          |
| TP0 vs. PU0        | 0.000393      | 31.464   | 5.69E-217    | 0.003          | Yes          |
| TP0 vs. BPU        | 0.000411      | 32.789   | 2.03E-235    | 0.003          | Yes          |
| TP0 vs. RANDOMS    | 0.000466      | 37.302   | 6.80E-304    | 0.003          | Yes          |
| BTP vs. PU4        | 0.0000983     | 9.179    | 4.38E-20     | 0.01           | Yes          |
| BTP vs. PU0        | 0.000295      | 29.696   | 1.59E-193    | 0.004          | Yes          |
| BTP vs. BPU        | 0.000313      | 31.349   | 2.11E-215    | 0.003          | Yes          |
| BTP vs. RANDOMS    | 0.000368      | 37.035   | 1.33E-299    | 0.003          | Yes          |
| PU4 vs. PU0        | 0.000197      | 39.907   | 0            | 0.002          | Yes          |
| PU4 vs. BPU        | 0.00021       | 42.99200 | 0.00000      | 0.00200        | Yes          |
| PU4 vs. RANDOMS    | 0.00          | 54.78    | 0.00         | 0.00           | Yes          |
| PU0 vs. BPU        | 0.0000171     | 5.624    | 1.86E-08     | 0.025          | Yes          |
| PU0 vs. RANDOMS    | 0.0000728     | 24.647   | 5.24E-134    | 0.005          | Yes          |
| BPU vs. RANDOMS    | 0.0000557     | 18.39    | 1.72E-75     | 0.006          | Yes          |

**Additional Table A3 — Distributions of  $T$  score between the different interaction data sets**

| $T$ score | Interaction data sets |              |              |                |               |                 |                 |                 |       |
|-----------|-----------------------|--------------|--------------|----------------|---------------|-----------------|-----------------|-----------------|-------|
|           | KNOWN2                | TP4          | TP0          | BTP            | PU4           | PU0             | BPU             | RANDOM          |       |
| 0         | 18,107 (47.74%)       | 151 (10.29%) | 672 (26.13%) | 1,239 (30.00%) | 6246 (34.33%) | 57,614 (65.25%) | 42,203 (52.51%) | 68,659 (75.56%) |       |
| 1         | 5,344 (14.09%)        | 72 (4.91%)   | 320 (12.44%) | 557 (13.49%)   | 1199 (6.59%)  | 8,730 (9.89%)   | 9,159 (11.40%)  | 8,839 (9.73%)   |       |
| 2         | 3,242 (8.55%)         | 60 (4.09%)   | 186 (7.23%)  | 343 (8.31%)    | 1115 (6.13%)  | 5,488 (6.22%)   | 6,273 (7.81%)   | 4,706 (5.18%)   |       |
| 3         | 2,269 (5.98%)         | 74 (5.04%)   | 166 (6.45%)  | 267 (6.46%)    | 1112 (6.11%)  | 3,987 (4.52%)   | 4,621 (5.75%)   | 2,838 (3.12%)   |       |
| 4         | 1,743 (4.60%)         | 68 (4.64%)   | 116 (4.51%)  | 170 (4.12%)    | 1054 (5.79%)  | 2,829 (3.20%)   | 3,399 (4.23%)   | 1,777 (1.96%)   |       |
| 5         | 1,339 (3.53%)         | 100 (6.82%)  | 124 (4.82%)  | 183 (4.43%)    | 1137 (6.25%)  | 2,203 (2.49%)   | 2,926 (3.64%)   | 1,236 (1.36%)   |       |
| 6         | 1,047 (2.76%)         | 83 (5.66%)   | 111 (4.32%)  | 155 (3.75%)    | 1009 (5.55%)  | 1,651 (1.87%)   | 2,384 (2.97%)   | 812 (0.89%)     |       |
| 7         | 853 (2.25%)           | 79 (5.39%)   | 87 (3.38%)   | 139 (3.37%)    | 896 (4.93%)   | 1,185 (1.34%)   | 1,843 (2.29%)   | 615 (0.68%)     |       |
| 8         | 705 (1.86%)           | 93 (6.34%)   | 103 (4.00%)  | 140 (3.39%)    | 851 (4.68%)   | 1,007 (1.14%)   | 1,458 (1.81%)   | 384 (0.42%)     |       |
| 9         | 592 (1.56%)           | 84 (5.73%)   | 84 (3.27%)   | 113 (2.74%)    | 766 (4.21%)   | 798 (0.90%)     | 1,276 (1.59%)   | 314 (0.35%)     |       |
| 10        | 480 (1.27%)           | 81 (5.52%)   | 81 (3.15%)   | 107 (2.59%)    | 546 (3.00%)   | 546 (0.62%)     | 937 (1.17%)     | 213 (0.23%)     |       |
| 11        | 406 (1.07%)           | 67 (4.57%)   | 67 (2.60%)   | 92 (2.23%)     | 565 (3.11%)   | 565 (0.64%)     | 862 (1.07%)     | 151 (0.17%)     |       |
| 12        | 385 (1.02%)           | 59 (4.02%)   | 59 (2.29%)   | 87 (2.11%)     | 419 (2.30%)   | 419 (0.47%)     | 734 (0.91%)     | 99 (0.11%)      |       |
| 13        | 251 (0.66%)           | 52 (3.54%)   | 52 (2.02%)   | 73 (1.77%)     | 312 (1.72%)   | 312 (0.35%)     | 530 (0.66%)     | 65 (0.07%)      |       |
| 14        | 244 (0.64%)           | 43 (2.93%)   | 43 (1.67%)   | 64 (1.55%)     | 321 (1.76%)   | 321 (0.36%)     | 496 (0.62%)     | 61 (0.07%)      |       |
| 15        | 187 (0.49%)           | 46 (3.14%)   | 46 (1.79%)   | 64 (1.55%)     | 216 (1.19%)   | 216 (0.24%)     | 391 (0.49%)     | 25 (0.03%)      |       |
| 16        | 161 (0.42%)           | 35 (2.39%)   | 35 (1.36%)   | 56 (1.36%)     | 153 (0.84%)   | 153 (0.17%)     | 270 (0.34%)     | 25 (0.03%)      |       |
| 17        | 125 (0.33%)           | 45 (3.07%)   | 45 (1.75%)   | 59 (1.43%)     | 95 (0.52%)    | 95 (0.11%)      | 234 (0.29%)     | 20 (0.02%)      |       |
| 18        | 102 (0.27%)           | 35 (2.39%)   | 35 (1.36%)   | 47 (1.14%)     | 85 (0.47%)    | 85 (0.10%)      | 172 (0.21%)     | 16 (0.02%)      |       |
| 19        | 94 (0.25%)            | 34 (2.32%)   | 34 (1.32%)   | 42 (1.02%)     | 42 (0.23%)    | 42 (0.05%)      | 106 (0.13%)     | 7 (0.01%)       |       |
| 20        | 63 (0.17%)            | 13 (0.89%)   | 13 (0.51%)   | 26 (0.63%)     | 31 (0.17%)    | 31 (0.04%)      | 57 (0.07%)      | 6 (0.01%)       |       |
| 21        | 34 (0.09%)            | 23 (1.57%)   | 23 (0.89%)   | 26 (0.63%)     | 10 (0.05%)    | 10 (0.01%)      | 21 (0.03%)      | 3 (0.00%)       |       |
| 22        | 36 (0.09%)            | 15 (1.02%)   | 15 (0.58%)   | 18 (0.44%)     | 3 (0.02%)     | 3 (0.00%)       | 12 (0.01%)      | 0 (0.00%)       |       |
| 23        | 40 (0.11%)            | 14 (0.95%)   | 14 (0.54%)   | 16 (0.39%)     | 4 (0.02%)     | 4 (0.00%)       | 3 (0.00%)       | 0 (0.00%)       |       |
| 24        | 18 (0.05%)            | 11 (0.75%)   | 11 (0.43%)   | 12 (0.29%)     | 0 (0.00%)     | 0 (0.00%)       | 1 (0.00%)       | 0 (0.00%)       |       |
| 25        | 19 (0.05%)            | 12 (0.82%)   | 12 (0.47%)   | 12 (0.29%)     | 0 (0.00%)     | 0 (0.00%)       | 1 (0.00%)       | 0 (0.00%)       |       |
| 26        | 9 (0.02%)             | 3 (0.20%)    | 3 (0.12%)    | 5 (0.12%)      | 2 (0.01%)     | 2 (0.00%)       | 1 (0.00%)       | 0 (0.00%)       |       |
| 27        | 7 (0.02%)             | 2 (0.14%)    | 2 (0.08%)    | 3 (0.07%)      | 1 (0.01%)     | 1 (0.00%)       | 0 (0.00%)       | 0 (0.00%)       |       |
| 28        | 8 (0.02%)             | 4 (0.27%)    | 4 (0.16%)    | 7 (0.17%)      | 1 (0.01%)     | 1 (0.00%)       | 0 (0.00%)       | 0 (0.00%)       |       |
| 29        | 7 (0.02%)             | 0 (0.00%)    | 0 (0.00%)    | 2 (0.05%)      | 1 (0.01%)     | 1 (0.00%)       | 1 (0.00%)       | 0 (0.00%)       |       |
| 30        | 2 (0.01%)             | 2 (0.14%)    | 2 (0.08%)    | 1 (0.02%)      | 0 (0.00%)     | 0 (0.00%)       | 0 (0.00%)       | 0 (0.00%)       |       |
| 31        | 4 (0.01%)             | 5 (0.34%)    | 5 (0.19%)    | 3 (0.07%)      | 0 (0.00%)     | 0 (0.00%)       | 0 (0.00%)       | 0 (0.00%)       |       |
| 32        | 3 (0.01%)             | 2 (0.14%)    | 2 (0.08%)    | 2 (0.05%)      | 0 (0.00%)     | 0 (0.00%)       | 0 (0.00%)       | 0 (0.00%)       |       |
| 33        | 1 (0.00%)             | 0 (0.00%)    | 0 (0.00%)    | 0 (0.00%)      | 0 (0.00%)     | 0 (0.00%)       | 0 (0.00%)       | 0 (0.00%)       |       |
| 34        | 0 (0.00%)             | 0 (0.00%)    | 0 (0.00%)    | 0 (0.00%)      | 0 (0.00%)     | 0 (0.00%)       | 0 (0.00%)       | 0 (0.00%)       |       |
| 35        | 0 (0.00%)             | 0 (0.00%)    | 0 (0.00%)    | 0 (0.00%)      | 0 (0.00%)     | 0 (0.00%)       | 0 (0.00%)       | 0 (0.00%)       |       |
| 36        | 2 (0.01%)             | 0 (0.00%)    | 0 (0.00%)    | 0 (0.00%)      | 0 (0.00%)     | 0 (0.00%)       | 0 (0.00%)       | 0 (0.00%)       |       |
| Total     | 37,929 (100.00%)      | 1,467 (100%) | 2,572 (100%) | 4,130 (100%)   | 18,192 (100%) | 88,299 (100%)   | 80,371 (100%)   | 90,871 (100%)   |       |
| Min.      | 0.000                 | 0.000        | 0.000        | 0.000          | 0.000         | 0.000           | 0.000           | 0.000           | 0.000 |
| Mean      | 2.453                 | 8.973        | 5.612        | 4.897          | 4.104         | 1.398           | 2.201           | 0.699           |       |
| Max.      | 36.000                | 32.000       | 32.000       | 32.000         | 29.000        | 29.000          | 29.000          | 21.000          |       |
| Std Err   | 0.021                 | 0.174        | 0.126        | 0.094          | 0.033         | 0.010           | 0.013           | 0.006           |       |

**Additional Table A4 — ANOVA tests of  $T$  score between the different interaction data sets**

| Comparison         | Diff of Means | t      | Unadjusted P | Critical Level | Significant? |
|--------------------|---------------|--------|--------------|----------------|--------------|
| KNOWN2 vs. TP4     | 6.52          | 75.62  | 0            | 0.00           | Yes          |
| KNOWN2 vs. TP0     | 3.159         | 48.01  | 0            | 0.01           | Yes          |
| KNOWN2 vs. BTP     | 2.444         | 46.17  | 0            | 0.00           | Yes          |
| KNOWN2 vs. PU4     | 1.651         | 58.03  | 0            | 0.00           | Yes          |
| KNOWN2 vs. PU0     | 1.055         | 53.21  | 0            | 0.00           | Yes          |
| KNOWN2 vs. BPU     | 0.252         | 12.51  | 6.83E-36     | 0.03           | Yes          |
| KNOWN2 vs. RANDOMS | 1.754         | 88.84  | 0            | 0.00           | Yes          |
| TP4 vs. TP0        | 3.361         | 31.74  | 1.07E-220    | 0.01           | Yes          |
| TP4 vs. BTP        | 4.077         | 41.42  | 0            | 0.01           | Yes          |
| TP4 vs. PU4        | 4.869         | 55.52  | 0            | 0.01           | Yes          |
| TP4 vs. PU0        | 7.575         | 88.80  | 0            | 0.01           | Yes          |
| TP4 vs. BPU        | 6.772         | 79.32  | 0.00E+00     | 0.00           | Yes          |
| TP4 vs. RANDOMS    | 8.274         | 97.02  | 0            | 0.00           | Yes          |
| TP0 vs. BTP        | 0.716         | 8.82   | 1.12E-18     | 0.05           | Yes          |
| TP0 vs. PU4        | 1.509         | 22.27  | 9.16E-110    | 0.01           | Yes          |
| TP0 vs. PU0        | 4.214         | 65.23  | 0            | 0.01           | Yes          |
| TP0 vs. BPU        | 3.411         | 52.72  | 0.00E+00     | 0.01           | Yes          |
| TP0 vs. RANDOMS    | 4.913         | 76.08  | 0            | 0.00           | Yes          |
| BTP vs. PU4        | 0.793         | 14.33  | 1.41E-46     | 0.02           | Yes          |
| BTP vs. PU0        | 3.499         | 68.04  | 0            | 0.00           | Yes          |
| BTP vs. BPU        | 2.695         | 52.30  | 0            | 0.00           | Yes          |
| BTP vs. RANDOMS    | 4.198         | 81.69  | 0            | 0.00           | Yes          |
| PU4 vs. PU0        | 2.706         | 105.95 | 0            | 0.00           | Yes          |
| PU4 vs. BPU        | 1.902         | 73.83  | 0            | 0.00           | Yes          |
| PU4 vs. RANDOMS    | 3.405         | 133.66 | 0            | 0.00           | Yes          |
| PU0 vs. BPU        | 0.803         | 51.03  | 0.00E+00     | 0.00           | Yes          |
| PU0 vs. RANDOMS    | 0.699         | 45.80  | 0.00E+00     | 0.00           | Yes          |
| BPU vs. RANDOMS    | 1.502         | 96.07  | 0            | 0.00           | Yes          |

**Additional Table A5 — Distributions of  $L$  score between the different interaction data sets**

| $L$ score | Interaction data sets |                  |                  |                  |                   |                   |                   |                   |
|-----------|-----------------------|------------------|------------------|------------------|-------------------|-------------------|-------------------|-------------------|
|           | KNOWN2                | TP4              | TP0              | BTP              | PU4               | PU0               | BPU               | RANDOMS           |
| 1         | 11,818 (31.16%)       | 101 (6.88 %)     | 341 (13.26%)     | 668 (16.17%)     | 5,075 (27.90%)    | 44,125 (49.97%)   | 32,370 (40.28%)   | 55,496 (61.07%)   |
| 2         | 4,084 (10.77%)        | 37 (2.52 %)      | 107 (4.16%)      | 209 (5.06%)      | 339 (1.86%)       | 4,538 (5.14%)     | 3,904 (4.86%)     | 8,975 (9.88%)     |
| 3         | 2,778 (7.32%)         | 15 (1.02 %)      | 64 (2.49%)       | 164 (3.97%)      | 890 (4.89%)       | 5,542 (6.28%)     | 6,890 (8.57%)     | 6,063 (6.67%)     |
| 4         | 7,320 (19.30%)        | 310 (21.13 %)    | 662 (25.74%)     | 1,077 (26.08%)   | 3,006 (16.52%)    | 9,983 (11.31%)    | 10,229 (12.73%)   | 5,434 (5.98%)     |
| 5         | 1,563 (4.12%)         | 53 (3.61 %)      | 106 (4.12%)      | 157 (3.80%)      | 1,629 (8.95%)     | 5,528 (6.26%)     | 5,323 (6.62%)     | 2,620 (2.88%)     |
| 6         | 59 (0.16%)            | 10 (0.68 %)      | 18 (0.70%)       | 18 (0.44%)       | 24 (0.13%)        | 73 (0.08%)        | 46 (0.06%)        | 7 (0.01%)         |
| 7         | 1,312 (3.46%)         | 19 (1.30 %)      | 43 (1.67%)       | 84 (2.03%)       | 1,598 (8.78%)     | 5,658 (6.41%)     | 7,622 (9.48%)     | 6,296 (6.93%)     |
| 8         | 7,456 (19.66%)        | 485 (33.06 %)    | 730 (28.38%)     | 1,064 (25.76%)   | 3,846 (21.14%)    | 10,418 (11.80%)   | 11,112 (13.83%)   | 5,857 (6.45%)     |
| 9         | 436 (1.15%)           | 64 (4.36 %)      | 82 (3.19%)       | 136 (3.29%)      | 521 (2.86%)       | 934 (1.06%)       | 847 (1.05%)       | 61 (0.07%)        |
| 10        | 361 (0.95%)           | 80 (5.45 %)      | 102 (3.97%)      | 138 (3.34%)      | 532 (2.92%)       | 651 (0.74%)       | 1,136 (1.41%)     | 38 (0.04%)        |
| 11        | 207 (0.55%)           | 104 (7.09 %)     | 114 (4.43%)      | 141 (3.41%)      | 501 (2.75%)       | 565 (0.64%)       | 558 (0.69%)       | 16 (0.02%)        |
| 12        | 339 (0.89%)           | 107 (7.29 %)     | 114 (4.43%)      | 135 (3.27%)      | 188 (1.03%)       | 225 (0.25%)       | 232 (0.29%)       | 6 (0.01%)         |
| 13        | 120 (0.32%)           | 54 (3.68 %)      | 60 (2.33%)       | 93 (2.25%)       | 22 (0.12%)        | 35 (0.04%)        | 40 (0.05%)        | 0 (0.00%)         |
| 14        | 17 (0.04%)            | 7 (0.48 %)       | 8 (0.31%)        | 16 (0.39%)       | 1 (0.01%)         | 2 (0.00%)         | 11 (0.01%)        | 0 (0.00%)         |
| 15        | 46 (0.12%)            | 14 (0.95 %)      | 14 (0.54%)       | 26 (0.63%)       | 18 (0.10%)        | 20 (0.02%)        | 50 (0.06%)        | 2 (0.00%)         |
| 16        | 7 (0.02%)             | 4 (0.27 %)       | 4 (0.16%)        | 3 (0.07%)        | 2 (0.01%)         | 2 (0.00%)         | 1 (0.00%)         | 0 (0.00%)         |
| 17        | 5 (0.01%)             | 2 (0.14 %)       | 2 (0.08%)        | 0 (0.00%)        | 0 (0.00%)         | 0 (0.00%)         | 0 (0.00%)         | 0 (0.00%)         |
| 18        | 1 (0.00%)             | 0 (0.00%)        | 0 (0.00%)        | 0 (0.00%)        | 0 (0.00%)         | 0 (0.00%)         | 0 (0.00%)         | 0 (0.00%)         |
| 19        | 0 (0.00%)             | 1 (0.07%)        | 1 (0.04%)        | 1 (0.02%)        | 0 (0.00%)         | 0 (0.00%)         | 0 (0.00%)         | 0 (0.00%)         |
| Total     | 37,929 (100.00 %)     | 1,467 (100.00 %) | 2,572 (100.00 %) | 4,130 (100.00 %) | 18,192 (100.00 %) | 88,299 (100.00 %) | 80,371 (100.00 %) | 90,871 (100.00 %) |
| Min.      | 1.000                 | 1.000            | 1.000            | 1.000            | 1.000             | 1.000             | 1.000             | 1.000             |
| Mean      | 3.986                 | 7.022            | 6.133            | 5.701            | 4.531             | 3.233             | 3.736             | 2.400             |
| Max.      | 18.000                | 19.000           | 19.000           | 19.000           | 15.000            | 16.000            | 16.000            | 15.000            |
| Std Err   | 0.015                 | 0.090            | 0.069            | 0.054            | 0.023             | 0.009             | 0.010             | 0.008             |

**Additional Table A6 — ANOVA tests of  $L$  score between the different interaction data sets**

| Comparison         | Diff of Means | t     | Unadjusted P | Critical Level | Significant? |
|--------------------|---------------|-------|--------------|----------------|--------------|
| KNOWN2 vs. TP4     | 3.036         | 41.38 | 0            | 0.00           | Yes          |
| KNOWN2 vs. TP0     | 2.147         | 38.34 | 7.950E-321   | 0.00           | Yes          |
| KNOWN2 vs. BTP     | 1.715         | 38.08 | 1.343E-316   | 0.01           | Yes          |
| KNOWN2 vs. PU4     | 0.545         | 22.52 | 3.22E-112    | 0.01           | Yes          |
| KNOWN2 vs. PU0     | 0.753         | 44.65 | 0            | 0.00           | Yes          |
| KNOWN2 vs. BPU     | 0.25          | 14.61 | 2.45E-48     | 0.02           | Yes          |
| KNOWN2 vs. RANDOMS | 1.58          | 94.04 | 0            | 0.00           | Yes          |
| TP4 vs. TP0        | 0.889         | 9.87  | 5.65E-23     | 0.03           | Yes          |
| TP4 vs. BTP        | 1.321         | 15.78 | 4.60E-56     | 0.01           | Yes          |
| TP4 vs. PU4        | 2.491         | 33.38 | 7.84E-244    | 0.01           | Yes          |
| TP4 vs. PU0        | 3.789         | 52.21 | 0            | 0.00           | Yes          |
| TP4 vs. BPU        | 3.286         | 45.24 | 0.00E+00     | 0.00           | Yes          |
| TP4 vs. RANDOMS    | 4.616         | 63.61 | 0            | 0.00           | Yes          |
| TP0 vs. BTP        | 0.432         | 6.26  | 3.95E-10     | 0.05           | Yes          |
| TP0 vs. PU4        | 1.602         | 27.78 | 1.09E-169    | 0.01           | Yes          |
| TP0 vs. PU0        | 2.9           | 52.76 | 0.00E+00     | 0.00           | Yes          |
| TP0 vs. BPU        | 2.397         | 43.54 | 0            | 0.00           | Yes          |
| TP0 vs. RANDOMS    | 3.726         | 67.82 | 0.00E+00     | 0.00           | Yes          |
| BTP vs. PU4        | 1.17          | 24.85 | 3.26E-136    | 0.01           | Yes          |
| BTP vs. PU0        | 2.47          | 56.41 | 0.00         | 0.00           | Yes          |
| BTP vs. BPU        | 1.97          | 44.81 | 0.00         | 0.00           | Yes          |
| BTP vs. RANDOMS    | 3.295         | 75.35 | 0            | 0.00           | Yes          |
| PU4 vs. PU0        | 1.30          | 59.75 | 0.00         | 0.00           | Yes          |
| PU4 vs. BPU        | 0.795         | 36.27 | 1.71E-287    | 0.01           | Yes          |
| PU4 vs. RANDOMS    | 2.125         | 98.04 | 0            | 0.00           | Yes          |
| PU0 vs. BPU        | 0.503         | 37.56 | 4.28E-308    | 0.01           | Yes          |
| PU0 vs. RANDOMS    | 0.826         | 63.64 | 0.00E+00     | 0.00           | Yes          |
| BPU vs. RANDOMS    | 1.33          | 99.92 | 0.00E+00     | 0.00           | Yes          |

**Additional Table A7 — Distributions of  $P$  score between the different interaction data sets**

| $P$ score | Interaction data sets |                     |                |                |                     |                 |                 |                  |       |
|-----------|-----------------------|---------------------|----------------|----------------|---------------------|-----------------|-----------------|------------------|-------|
|           | KNOWN2                | TP4                 | TP0            | BTP            | PU4                 | PU0             | BPU             | RANDOMS          |       |
| 0         | 37,851 (99.79%)       | 1424 (97.06884799%) | 2,529 (98.33%) | 4,081 (98.81%) | 18169 (99.8735708%) | 88,276 (99.97%) | 80,345 (99.97%) | 90,867 (100.00%) |       |
| 1         | 75 (0.20%)            | 41 (2.794819359%)   | 41 (1.59%)     | 47 (1.14%)     | 23 (0.1264292%)     | 23 (0.03%)      | 26 (0.03%)      | 4 (0.00%)        |       |
| 2         | 3 (0.01%)             | 2 (0.136332652%)    | 2 (0.08%)      | 2 (0.05%)      | 0 (0.00%)           | 0 (0.00%)       | 0 (0.00%)       | 0 (0.00%)        |       |
| Total     | 37,929 (100%)         | 1,467 (100%)        | 2,572 (100%)   | 4,130 (100%)   | 18,192 (100%)       | 88,299 (100%)   | 80,371 (100%)   | 90,871 (100%)    |       |
| Min.      | 0.000                 | 0.000               | 0.000          | 0.000          | 0.000               | 0.000           | 0.000           | 0.000            | 0.000 |
| Mean      | 0.002                 | 0.031               | 0.017          | 0.012          | 0.001               | 0.000           | 0.000           | 0.000            | 0.000 |
| Max.      | 2.000                 | 2.000               | 2.000          | 2.000          | 1.000               | 1.000           | 1.000           | 1.000            | 1.000 |
| Std Err   | 0.000                 | 0.005               | 0.003          | 0.002          | 0.000               | 0.000           | 0.000           | 0.000            | 0.000 |

**Additional Table A8 — ANOVA tests of  $P$  score between the different interaction data sets**

| Comparison         | Diff of Means | t        | Unadjusted P | Critical Level | Significant? |
|--------------------|---------------|----------|--------------|----------------|--------------|
| KNOWN2 vs. TP4     | 0.0287        | 34.715   | 1.44E-263    | 0.002          | Yes          |
| KNOWN2 vs. TP0     | 0.0154        | 24.301   | 2.49E-130    | 0.003          | Yes          |
| KNOWN2 vs. BTP     | 0.0102        | 20.092   | 9.84E-90     | 0.004          | Yes          |
| KNOWN2 vs. PU4     | 0.000958      | 3.506    | 0.000455     | 0.01           | Yes          |
| KNOWN2 vs. PU0     | 0.00188       | 9.846    | 7.22E-23     | 0.005          | Yes          |
| KNOWN2 vs. BPU     | 0.00181       | 9.377    | 6.85E-21     | 0.006          | Yes          |
| KNOWN2 vs. RANDOMS | 0.00209       | 11.029   | 2.80E-28     | 0.005          | Yes          |
| TP4 vs. TP0        | 0.0134        | 13.163   | 1.47E-39     | 0.004          | Yes          |
| TP4 vs. BTP        | 0.0185        | 19.61    | 1.42E-85     | 0.004          | Yes          |
| TP4 vs. PU4        | 0.0297        | 35.262   | 7.30E-272    | 0.002          | Yes          |
| TP4 vs. PU0        | 0.03060       | 37.37500 | 0.00000      | 0.00200        | Yes          |
| TP4 vs. BPU        | 0.03060       | 37.26900 | 0.00000      | 0.00200        | Yes          |
| TP4 vs. RANDOMS    | 0.03080       | 37.64800 | 0.00000      | 0.00200        | Yes          |
| TP0 vs. BTP        | 0.00515       | 6.606    | 3.96E-11     | 0.006          | Yes          |
| TP0 vs. PU4        | 0.0163        | 25.078   | 1.18E-138    | 0.003          | Yes          |
| TP0 vs. PU0        | 0.0172        | 27.775   | 1.36E-169    | 0.002          | Yes          |
| TP0 vs. BPU        | 0.0172        | 27.635   | 6.55E-168    | 0.002          | Yes          |
| TP0 vs. RANDOMS    | 0.0175        | 28.136   | 5.83E-174    | 0.002          | Yes          |
| BTP vs. PU4        | 0.0112        | 21.026   | 4.45E-98     | 0.003          | Yes          |
| BTP vs. PU0        | 0.0121        | 24.476   | 3.49E-132    | 0.003          | Yes          |
| BTP vs. BPU        | 0.012         | 24.295   | 2.89E-130    | 0.003          | Yes          |
| BTP vs. RANDOMS    | 0.0123        | 24.93    | 4.71E-137    | 0.003          | Yes          |
| PU4 vs. PU0        | 0.000917      | 3.739    | 1.85E-04     | 0.009          | Yes          |
| PU4 vs. BPU        | 0.000854      | 3.451    | 0.000558     | 0.013          | Yes          |
| PU4 vs. RANDOMS    | 0.00113       | 4.633    | 3.60E-06     | 0.007          | Yes          |
| PU0 vs. BPU        | 0.000063      | 0.417    | 0.677        | 0.05           | No           |
| PU0 vs. RANDOMS    | 0.000216      | 1.477    | 0.14         | 0.025          | No           |
| BPU vs. RANDOMS    | 0.000279      | 1.861    | 0.0628       | 0.017          | No           |
