# Supplementary material for: Reconstruction of human protein interolog network using evolutionary conserved network
Source: PubMed Central journal article supplement (PMC1885812; doi:10.1186/1471-2105-8-152), 2007-05-10
Supplement: 1471-2105-8-152-S3.pdf [file 1471-2105-8-152-S3.pdf]

**Additional File 3** Top 20 predicted interacting protein pairs (from PU4 and PU0) not present in existing experimental data sets (KNOWN2).

| <b>Top 1</b>                        | <b>Protein A</b>                                                                                                                                                                                                                                    | <b>Protein B</b>                                                                                                 |
|-------------------------------------|-----------------------------------------------------------------------------------------------------------------------------------------------------------------------------------------------------------------------------------------------------|------------------------------------------------------------------------------------------------------------------|
|                                     | STK6_HUMAN                                                                                                                                                                                                                                          | PLK1_HUMAN                                                                                                       |
| Molecular function<br>GO term       | GO:0004672;protein kinase activity;<br>GO:0005515;protein binding                                                                                                                                                                                   | GO:0004674;protein serine/threonine kinase activity;<br>GO:0005515;protein binding                               |
| Biological process<br>GO term       | GO:0006468;protein amino acid phosphorylation;<br>GO:0007049;cell cycle;<br>GO:0007051;spindle organization and biogenesis;<br>GO:0007067;mitosis;<br>GO:0031647;regulation of protein stability;<br>GO:0048015;phosphoinositide-mediated signaling | GO:0000074;regulation of progression through cell cycle;<br>GO:0007067;mitosis;<br>GO:0008283;cell proliferation |
| UniProt functional keyword matching | 3D-structure<br>ATP-binding<br>Kinase<br>Nucleotide-binding<br>Phosphorylation<br>Serine/threonine-protein kinase<br>Transferase                                                                                                                    |                                                                                                                  |
| Cell-cycle stage                    | G2/M                                                                                                                                                                                                                                                |                                                                                                                  |
| OMIM ID                             | 602687                                                                                                                                                                                                                                              | 602098                                                                                                           |

| <b>Top 2</b>                        | <b>Protein A</b>                                                                                            | <b>Protein B</b>                                      |
|-------------------------------------|-------------------------------------------------------------------------------------------------------------|-------------------------------------------------------|
|                                     | ORC1_HUMAN                                                                                                  | MCM4_HUMAN                                            |
| Molecular function<br>GO term       | GO:0003677;DNA binding;<br>GO:0005515;protein binding                                                       | GO:0005515;protein binding;<br>GO:0005524;ATP binding |
| Biological process<br>GO term       | GO:0006270;DNA replication initiation                                                                       | GO:0006260;DNA replication                            |
| UniProt functional keyword matching | ATP-binding;<br>DNA replication;<br>DNA-binding;<br>Nuclear protein;<br>Nucleotide-binding;<br>Polymorphism |                                                       |
| Cell-cycle stage                    | G1/S                                                                                                        |                                                       |
| OMIM ID                             | 601902                                                                                                      | 602638                                                |

| <b>Top 3</b>                        | <b>Protein A</b>                                                                                                                                           | <b>Protein B</b>                                                                       |
|-------------------------------------|------------------------------------------------------------------------------------------------------------------------------------------------------------|----------------------------------------------------------------------------------------|
|                                     | MCM6_HUMAN                                                                                                                                                 | MCM5_HUMAN                                                                             |
| Molecular function<br>GO term       | GO:0005524;ATP binding;<br>GO:0042802;identical protein binding                                                                                            | GO:0005515;protein binding                                                             |
| Biological process<br>GO term       | O:0006260;DNA replication                                                                                                                                  | GO:0000074;regulation of progression through cell cycle;<br>GO:0006260;DNA replication |
| UniProt functional keyword matching | ATP-binding;<br>DNA replication;<br>DNA-binding;<br>Nuclear protein;<br>Nucleotide-binding;<br>Polymorphism;<br>Transcription;<br>Transcription regulation |                                                                                        |
| Cell-cycle stage                    | G1/S                                                                                                                                                       |                                                                                        |
| OMIM ID                             | 601806                                                                                                                                                     | 602696                                                                                 |

| <b>Top 4</b>                        | <b>Protein A</b>                                                                                                                                           | <b>Protein B</b>                                                                       |
|-------------------------------------|------------------------------------------------------------------------------------------------------------------------------------------------------------|----------------------------------------------------------------------------------------|
|                                     | MCM4_HUMAN                                                                                                                                                 | MCM5_HUMAN                                                                             |
| Molecular function<br>GO term       | GO:0005515;protein binding;<br>GO:0005524;ATP binding                                                                                                      | GO:0005515;protein binding                                                             |
| Biological process<br>GO term       | GO:0006260;DNA replication                                                                                                                                 | GO:0000074;regulation of progression through cell cycle;<br>GO:0006260;DNA replication |
| UniProt functional keyword matching | ATP-binding;<br>DNA replication;<br>DNA-binding;<br>Nuclear protein;<br>Nucleotide-binding;<br>Polymorphism;<br>Transcription;<br>Transcription regulation |                                                                                        |
| Cell-cycle stage                    | G1/S                                                                                                                                                       |                                                                                        |
| OMIM ID                             | 602638                                                                                                                                                     | 602696                                                                                 |

| <b>Top 5</b>                        | <b>Protein A</b>                                                                                            | <b>Protein B</b>                                                |
|-------------------------------------|-------------------------------------------------------------------------------------------------------------|-----------------------------------------------------------------|
|                                     | ORC1_HUMAN                                                                                                  | MCM6_HUMAN                                                      |
| Molecular function<br>GO term       | GO:0003677;DNA binding;<br>GO:0005515;protein binding                                                       | GO:0005524;ATP binding;<br>GO:0042802;identical protein binding |
| Biological process<br>GO term       | GO:0006270;DNA replication initiation                                                                       | GO:0006260;DNA replication                                      |
| UniProt functional keyword matching | ATP-binding;<br>DNA replication;<br>DNA-binding;<br>Nuclear protein;<br>Nucleotide-binding;<br>Polymorphism |                                                                 |
| Cell-cycle stage                    | G1/S                                                                                                        |                                                                 |
| OMIM ID                             | 601902                                                                                                      | 601806                                                          |

| <b>Top 6</b>                        | <b>Protein A</b>                                    | <b>Protein B</b>                                                                                                                             |
|-------------------------------------|-----------------------------------------------------|----------------------------------------------------------------------------------------------------------------------------------------------|
|                                     | PRI1_HUMAN                                          | RFC4_HUMAN                                                                                                                                   |
| Molecular function<br>GO term       | GO:0003896;DNA primase activity                     | GO:0005515;protein binding                                                                                                                   |
| Biological process<br>GO term       | GO:0006269;DNA replication, synthesis of RNA primer | GO:0006260;DNA replication;<br>GO:0006271;DNA strand elongation;<br>GO:0006281;DNA repair;<br>GO:0048015;phosphoinositide-mediated signaling |
| UniProt functional keyword matching | DNA replication;<br>Polymorphism                    |                                                                                                                                              |
| Cell-cycle stage                    | S                                                   |                                                                                                                                              |
| OMIM ID                             | 176635                                              | 102577                                                                                                                                       |

| <b>Top 7</b>                        | <b>Protein A</b>                                                                                                                                                                                                  | <b>Protein B</b>                                    |
|-------------------------------------|-------------------------------------------------------------------------------------------------------------------------------------------------------------------------------------------------------------------|-----------------------------------------------------|
|                                     | CDC7_HUMAN                                                                                                                                                                                                        | PRI1_HUMAN                                          |
| Molecular function<br>GO term       | GO:0004674;protein serine/threonine kinase activity;<br>GO:0005515;protein binding                                                                                                                                | GO:0003896;DNA primase activity                     |
| Biological process<br>GO term       | GO:0000082;G1/S transition of mitotic cell cycle;<br>GO:0006270;DNA replication initiation;<br>GO:0007089;traversing start control point of mitotic c...;<br>GO:0008285;negative regulation of cell proliferation | GO:0006269;DNA replication, synthesis of RNA primer |
| UniProt functional keyword matching | Polymorphism;<br>Transferase                                                                                                                                                                                      |                                                     |
| Cell-cycle stage                    | S                                                                                                                                                                                                                 |                                                     |
| OMIM ID                             | 603311                                                                                                                                                                                                            | 603078                                              |

| <b>Top 8</b>                        | <b>Protein A</b>                                      | <b>Protein B</b>                                    |
|-------------------------------------|-------------------------------------------------------|-----------------------------------------------------|
|                                     | RFC2_HUMAN                                            | PRI1_HUMAN                                          |
| Molecular function<br>GO term       | GO:0005515;protein binding;<br>GO:0005524;ATP binding | GO:0003896;DNA primase activity                     |
| Biological process<br>GO term       |                                                       | GO:0006269;DNA replication, synthesis of RNA primer |
| UniProt functional keyword matching | DNA replication;<br>Polymorphism                      |                                                     |
| Cell-cycle stage                    | S                                                     |                                                     |
| OMIM ID                             | 600404                                                | 176635                                              |

| <b>Top 9</b>                        | <b>Protein A</b>                                                                                 | <b>Protein B</b>                      |
|-------------------------------------|--------------------------------------------------------------------------------------------------|---------------------------------------|
|                                     | SMC4_HUMAN                                                                                       | KINH_HUMAN                            |
| Molecular function<br>GO term       | GO:0005524;ATP binding;<br>GO:0046982;protein heterodimerization activity                        | GO:0003777;microtubule motor activity |
| Biological process<br>GO term       | GO:0007001;chromosome organization and biogenesis;<br>GO:0007076;mitotic chromosome condensation | GO:0007018;microtubule-based movement |
| UniProt functional keyword matching | ATP-binding;<br>Coiled coil;<br>Nucleotide-binding                                               |                                       |
| Cell-cycle stage                    | G2                                                                                               |                                       |
| OMIM ID                             | 601902                                                                                           | 601806                                |

| <b>Top 10</b>                       | <b>Protein A</b>               | <b>Protein B</b>                             |
|-------------------------------------|--------------------------------|----------------------------------------------|
|                                     | H2BQ_HUMAN                     | TOP1_HUMAN                                   |
| Molecular function<br>GO term       | GO:0003677;DNA binding         | GO:0003917;DNA topoisomerase type I activity |
| Biological process<br>GO term       | GO:0006334;nucleosome assembly |                                              |
| UniProt functional keyword matching | DNA-binding                    |                                              |
| Cell-cycle stage                    | M/G1                           |                                              |
| OMIM ID                             | 601831                         | 126420                                       |

| <b>Top 11</b>                                | <b>Protein A</b>                                                                                                     | <b>Protein B</b>               |
|----------------------------------------------|----------------------------------------------------------------------------------------------------------------------|--------------------------------|
|                                              | IMB1_HUMAN                                                                                                           | H2BQ_HUMAN                     |
| Molecular function<br>GO term                | GO:0005515;protein binding;<br>GO:0008139;nuclear localization<br>sequence binding;<br>GO:0008270;zinc ion binding   | GO:0003677;DNA binding         |
| Biological process<br>GO term                | GO:0000060;protein import into<br>nucleus, translocation;<br>GO:0006607;NLS-bearing substrate<br>import into nucleus | GO:0006334;nucleosome assembly |
| UniProt<br>functional<br>keyword<br>matching | Nuclear protein                                                                                                      |                                |
| Cell-cycle<br>stage                          | M/G1                                                                                                                 |                                |
| OMIM ID                                      | 602738                                                                                                               | 601831                         |

| <b>Top 12</b>                                | <b>Protein A</b>                                       | <b>Protein B</b>                                                                                                                                |
|----------------------------------------------|--------------------------------------------------------|-------------------------------------------------------------------------------------------------------------------------------------------------|
|                                              | PRI2_HUMAN                                             | RFC4_HUMAN                                                                                                                                      |
| Molecular function<br>GO term                | GO:0003896;DNA primase activity                        | GO:0005515;protein binding                                                                                                                      |
| Biological process<br>GO term                | GO:0006269;DNA replication,<br>synthesis of RNA primer | GO:0006260;DNA replication;<br>GO:0006271;DNA strand elongation;<br>GO:0006281;DNA repair;<br>GO:0048015;phosphoinositide-mediated<br>signaling |
| UniProt<br>functional<br>keyword<br>matching | DNA replication                                        |                                                                                                                                                 |
| Cell-cycle<br>stage                          | S                                                      |                                                                                                                                                 |
| OMIM ID                                      | 176636                                                 | 102577                                                                                                                                          |

| <b>Top 13</b>                       | <b>Protein A</b>                                       | <b>Protein B</b>                                      |
|-------------------------------------|--------------------------------------------------------|-------------------------------------------------------|
|                                     | PRI2_HUMAN                                             | RFC2_HUMAN                                            |
| Molecular function<br>GO term       | GO:0003896;DNA primase activity                        | GO:0005515;protein binding;<br>GO:0005524;ATP binding |
| Biological process<br>GO term       | GO:0006269;DNA replication,<br>synthesis of RNA primer |                                                       |
| UniProt functional keyword matching | Alternative splicing;<br>DNA replication               |                                                       |
| Cell-cycle stage                    | S                                                      |                                                       |
| OMIM ID                             | 176636                                                 | 600404                                                |

| <b>Top 14</b>                       | <b>Protein A</b>                                       | <b>Protein B</b>                                                      |
|-------------------------------------|--------------------------------------------------------|-----------------------------------------------------------------------|
|                                     | PRI1_HUMAN                                             | RFA2_HUMAN                                                            |
| Molecular function<br>GO term       | GO:0003896;DNA primase activity                        | GO:0003697;single-stranded DNA binding;<br>GO:0005515;protein binding |
| Biological process<br>GO term       | GO:0006269;DNA replication,<br>synthesis of RNA primer | GO:0006261;DNA-dependent DNA replication                              |
| UniProt functional keyword matching | DNA replication;<br>Polymorphism                       |                                                                       |
| Cell-cycle stage                    | S                                                      |                                                                       |
| OMIM ID                             | 176635                                                 | 179836                                                                |

| <b>Top 15</b>                       | <b>Protein A</b>                                                                                                                                                                                                                                                                                                                                                         | <b>Protein B</b>                                                                     |
|-------------------------------------|--------------------------------------------------------------------------------------------------------------------------------------------------------------------------------------------------------------------------------------------------------------------------------------------------------------------------------------------------------------------------|--------------------------------------------------------------------------------------|
|                                     | HMGB2_HUMAN                                                                                                                                                                                                                                                                                                                                                              | H2AX_HUMAN                                                                           |
| Molecular function<br>GO term       | GO:0003690;double-stranded DNA binding;<br>GO:0003697;single-stranded DNA binding;<br>GO:0003700;transcription factor activity;<br>GO:0008301;DNA bending activity                                                                                                                                                                                                       | GO:0003677;DNA binding;<br>GO:0005515;protein binding                                |
| Biological process<br>GO term       | GO:0006260;DNA replication;<br>GO:0006268;DNA unwinding during replication;<br>GO:0006281;DNA repair;<br>GO:0006288;base-excision repair, DNA ligation;<br>GO:0006325;establishment and/or maintenance of chromat...;<br>GO:0006334;nucleosome assembly;<br>GO:0006357;regulation of transcription from RNA polyme...;<br>GO:0048015;phosphoinositide-mediated signaling | GO:0007001;chromosome organization and biogenesis;<br>GO:0006334;nucleosome assembly |
| UniProt functional keyword matching |                                                                                                                                                                                                                                                                                                                                                                          |                                                                                      |
| Cell-cycle stage                    | G2                                                                                                                                                                                                                                                                                                                                                                       |                                                                                      |
| OMIM ID                             | 163906                                                                                                                                                                                                                                                                                                                                                                   |                                                                                      |

| <b>Top 16</b>                       | <b>Protein A</b>                                                                     | <b>Protein B</b>                                                                   |
|-------------------------------------|--------------------------------------------------------------------------------------|------------------------------------------------------------------------------------|
|                                     | H2AX_HUMAN                                                                           | CHK2_HUMAN                                                                         |
| Molecular function<br>GO term       | GO:0003677;DNA binding;<br>GO:0005515;protein binding                                | GO:0005515;protein binding;<br>GO:0004674;protein serine/threonine kinase activity |
| Biological process<br>GO term       | GO:0007001;chromosome organization and biogenesis;<br>GO:0006334;nucleosome assembly | GO:0000077;DNA damage checkpoint;<br>GO:0006974;response to DNA damage stimulus    |
| UniProt functional keyword matching |                                                                                      |                                                                                    |
| Cell-cycle stage                    | G2                                                                                   |                                                                                    |
| OMIM ID                             |                                                                                      | 604373                                                                             |



| <b>Top 17</b>                       | <b>Protein A</b>                      | <b>Protein B</b>                                                                                                                       |
|-------------------------------------|---------------------------------------|----------------------------------------------------------------------------------------------------------------------------------------|
|                                     | IMDH1_HUMAN                           | ERBB3_HUMAN                                                                                                                            |
| Molecular function<br>GO term       | GO:0003938;IMP dehydrogenase activity | GO:0005006;epidermal growth factor receptor activity;<br>GO:0005515;protein binding;<br>GO:0046982;protein heterodimerization activity |
| Biological process<br>GO term       |                                       | GO:0006468;protein amino acid phosphorylation;<br>GO:0007165;signal transduction                                                       |
| UniProt functional keyword matching | 3D-structure;<br>Alternative splicing |                                                                                                                                        |
| Cell-cycle stage                    |                                       |                                                                                                                                        |
| OMIM ID                             | 146690                                | 190151                                                                                                                                 |

| <b>Top 18</b>                       | <b>Protein A</b>                                                                                                                                                                     | <b>Protein B</b>                                                                                                                       |
|-------------------------------------|--------------------------------------------------------------------------------------------------------------------------------------------------------------------------------------|----------------------------------------------------------------------------------------------------------------------------------------|
|                                     | RASH_HUMAN                                                                                                                                                                           | ERBB3_HUMAN                                                                                                                            |
| Molecular function<br>GO term       | GO:0008022;protein C-terminus binding                                                                                                                                                | GO:0005006;epidermal growth factor receptor activity;<br>GO:0005515;protein binding;<br>GO:0046982;protein heterodimerization activity |
| Biological process<br>GO term       | GO:0000074;regulation of progression through cell cycle;<br>GO:0006935;chemotaxis;<br>GO:0007166;cell surface receptor linked signal transduction;<br>GO:0009887;organ morphogenesis | GO:0006468;protein amino acid phosphorylation;<br>GO:0007165;signal transduction                                                       |
| UniProt functional keyword matching | 3D-structure;<br>Membrane;<br>Nucleotide-binding                                                                                                                                     |                                                                                                                                        |
| Cell-cycle stage                    |                                                                                                                                                                                      |                                                                                                                                        |
| OMIM ID                             | 190020                                                                                                                                                                               | 190151                                                                                                                                 |

| <b>Top 19</b>                       | <b>Protein A</b>                                                                                                                                                   | <b>Protein B</b>                                                                    |
|-------------------------------------|--------------------------------------------------------------------------------------------------------------------------------------------------------------------|-------------------------------------------------------------------------------------|
|                                     | FRK_HUMAN                                                                                                                                                          | TEC_HUMAN                                                                           |
| Molecular function<br>GO term       | GO:0004715;non-membrane spanning protein tyrosine kinase activity                                                                                                  | GO:0004715;non-membrane spanning protein tyrosine kinase activity                   |
| Biological process<br>GO term       | GO:0000074;regulation of progression through cell cycle;<br>GO:0006468;protein amino acid phosphorylation;<br>GO:0008285;negative regulation of cell proliferation | GO:0006468;protein amino acid phosphorylation;<br>GO:0007243;protein kinase cascade |
| UniProt functional keyword matching | ATP-binding;<br>Kinase;<br>Nucleotide-binding;<br>Phosphorylation;<br>SH2 domain;<br>SH3 domain;<br>Transferase;<br>Tyrosine-protein kinase                        |                                                                                     |
| Cell-cycle stage                    |                                                                                                                                                                    |                                                                                     |
| OMIM ID                             | 606573                                                                                                                                                             | 600583                                                                              |

| <b>Top 20</b>                       | <b>Protein A</b>                                                     | <b>Protein B</b>                                                                                                                       |
|-------------------------------------|----------------------------------------------------------------------|----------------------------------------------------------------------------------------------------------------------------------------|
|                                     | RHOC_HUMAN                                                           | ERBB3_HUMAN                                                                                                                            |
| Molecular function<br>GO term       | GO:0003924;GTPase activity;<br>GO:0004871;signal transducer activity | GO:0005006;epidermal growth factor receptor activity;<br>GO:0005515;protein binding;<br>GO:0046982;protein heterodimerization activity |
| Biological process<br>GO term       | GO:0043123;positive regulation of I-kappaB kinase/NF-kappaB cascade  | GO:0006468;protein amino acid phosphorylation;<br>GO:0007165;signal transduction                                                       |
| UniProt functional keyword matching | 3D-structure;<br>Membrane;<br>Nucleotide-binding                     |                                                                                                                                        |
| Cell-cycle stage                    |                                                                      |                                                                                                                                        |
| OMIM ID                             | 165380                                                               | 190151                                                                                                                                 |
